# Supplementary material
Source: Springer Nature journal article supplement (https://www.springermedizin.de/resource/supplementary/12963_2010_138_MOESM2_ESM.pdf/9572738)

(a)

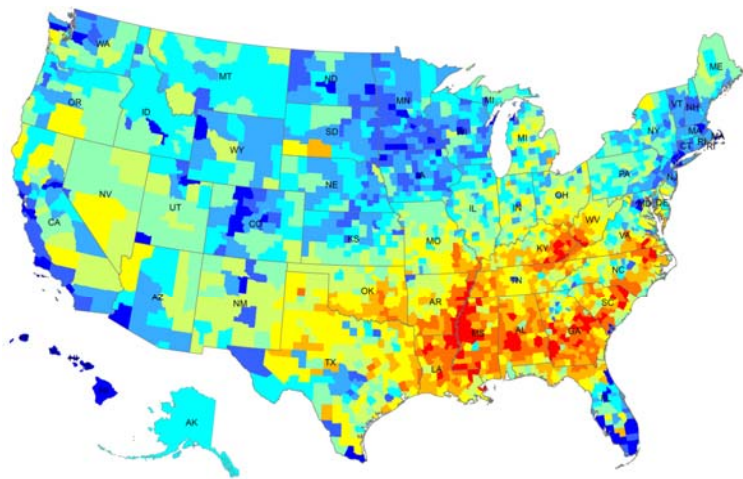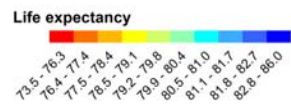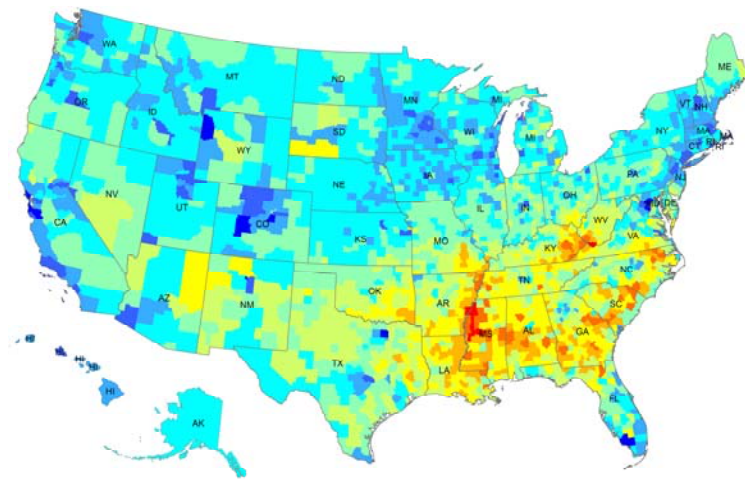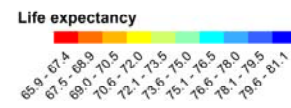

Females

Males

(b)

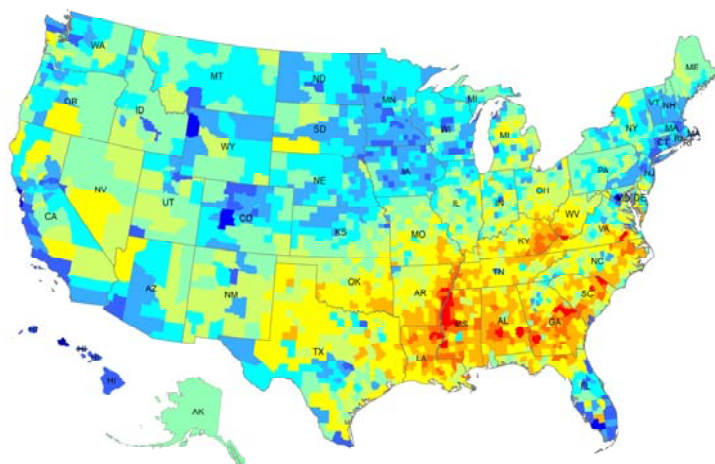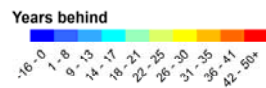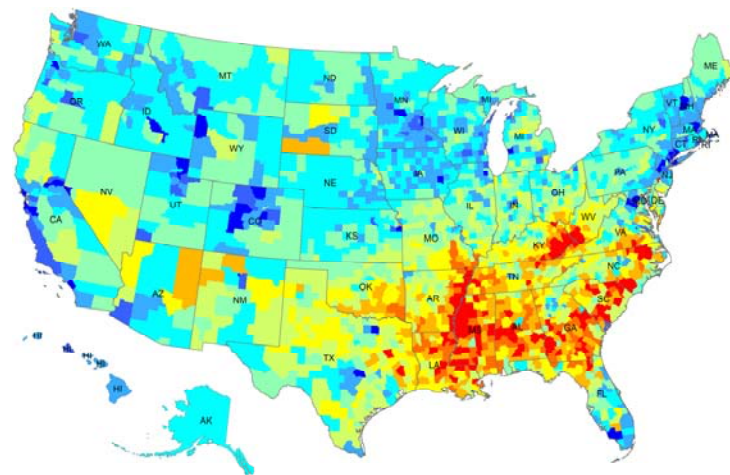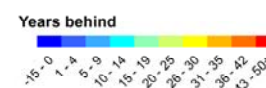

Females

Males

Supplement: MOESM2 [file 9572738]
